# Supplementary material for: Increasing awareness for tick-borne encephalitis virus using small ruminants as suitable sentinels: Preliminary observations
Source: PubMed Central journal article supplement — One Health. 2021 Feb 20;12:100227. doi: 10.1016/j.onehlt.2021.100227 (PMC7937955; doi:10.1016/j.onehlt.2021.100227), 2021-02-20
Supplement: mmc1.pdf [file mmc1.pdf]

Table A.1. Intra-herd prevalence (IHP) of TBEV-specific antibodies in small ruminants collected in German TBEV risk areas (Baden-Wuerttemberg, Bavaria) and incidence of human TBE cases in 2017 within the district.

|                          | <i>Flock ID</i>           | No. of Sheep | No. of positive Sheep | <b>IHP Sheep %</b> | No. of Goats | No. of positive Goats | <b>IHP Goats %</b> | <b>Incidence Humans 2017</b> |
|--------------------------|---------------------------|--------------|-----------------------|--------------------|--------------|-----------------------|--------------------|------------------------------|
| District                 | <b>Baden-Wuerttemberg</b> |              |                       |                    |              |                       |                    |                              |
| Baden-Baden              | 70                        | 44           | 0                     | <b>0</b>           | 10           | 0                     | <b>0</b>           | <b>1.83</b>                  |
| Breisgau-Hochschwarzwald | 68                        | 44           | 0                     | <b>0</b>           | 0            |                       |                    | <b>1.14</b>                  |
|                          | 69                        | 33           | 0                     | <b>0</b>           | 0            |                       |                    |                              |
| Esslingen                | 9                         | 44           | 0                     | <b>0</b>           | 3            | 0                     | <b>0</b>           | <b>0.56</b>                  |
| Freiburg/Breisgau        | 66                        | 41           | 0                     | <b>0</b>           | 0            |                       |                    | <b>0.87</b>                  |
| Heidenheim/Brenz         | 32                        | 43           | 2                     | <b>4.7</b>         | 11           | 0                     | <b>0</b>           | <b>0.76</b>                  |
|                          | 42                        | 20           | 0                     | <b>0</b>           | 19           | 0                     | <b>0</b>           |                              |
| Heilbronn                | 63                        | 40           | 0                     | <b>0</b>           | 0            |                       |                    | <b>0.29</b>                  |
| Raststatt                | 64                        | 44           | 7                     | <b>15.9</b>        | 0            |                       |                    | <b>0</b>                     |
| Rhein-Neckar-Kreis       | 71                        | 44           | 5                     | <b>11.4</b>        | 0            |                       |                    | <b>0.55</b>                  |
| Tübingen                 | 23                        | 40           | 2                     | <b>5</b>           | 5            | 0                     | <b>0</b>           | <b>6.64</b>                  |
|                          | 31                        | 44           | 8                     | <b>18.2</b>        | 4            | 1                     | <b>25.0</b>        |                              |
| Ortenaukreis             | 65                        | 35           | 7                     | <b>20</b>          | 0            |                       |                    | <b>4.93</b>                  |
| Zollernalbkreis          | 78                        | 44           | 3                     | <b>6.8</b>         | 19           | 1                     | <b>5.3</b>         | <b>4.25</b>                  |
| District                 | <b>Bavaria</b>            |              |                       |                    |              |                       |                    |                              |
| Amberg-Sulzbach          | 13                        | 36           | 0                     | <b>0</b>           | 0            |                       |                    | <b>10.70</b>                 |
| Ansbach                  | 76                        | 44           | 5                     | <b>11.4</b>        | 15           | 6                     | <b>40.0</b>        | <b>3.27</b>                  |
|                          | 77                        | 44           | 0                     | <b>0</b>           | 0            |                       |                    |                              |
| Aschaffenburg            | 29                        | 41           | 3                     | <b>7.3</b>         | 0            |                       |                    | <b>0.57</b>                  |
|                          | 36                        | 44           | 4                     | <b>9.1</b>         | 30           | 0                     | <b>0</b>           |                              |
|                          | 62                        | 20           | 0                     | <b>0</b>           | 13           | 1                     | <b>7.7</b>         |                              |
| Bad Kissingen            | 28                        | 40           | 1                     | <b>2.5</b>         | 0            |                       |                    | <b>0</b>                     |
| Bayreuth                 | 21                        | 37           | 2                     | <b>5.4</b>         | 4            | 1                     | <b>25.0</b>        | <b>4.82</b>                  |
| Dachau                   | 80                        | 44           | 11                    | <b>25</b>          | 0            |                       |                    | <b>0</b>                     |
| Donauwörth               | 43                        | 40           | 0                     | <b>0</b>           | 16           | 0                     | <b>0</b>           | <b>0</b>                     |

|                    |    |    |   |             |    |   |             |             |
|--------------------|----|----|---|-------------|----|---|-------------|-------------|
| Ebersberg          | 72 | 26 | 0 | <b>0</b>    | 0  |   |             | <b>0</b>    |
| Erlangen-Höchstadt | 22 | 44 | 6 | <b>13.6</b> | 30 | 8 | <b>26.7</b> | <b>1.48</b> |
| Main-Spessart      | 18 | 44 | 0 | <b>0</b>    | 36 | 0 | <b>0</b>    | <b>0</b>    |
|                    | 33 | 44 | 1 | <b>2.3</b>  | 0  |   |             |             |
|                    | 35 | 29 | 0 | <b>0</b>    | 7  | 0 | <b>0</b>    |             |
| Neumarkt/Oberpfalz | 58 | 40 | 0 | <b>0</b>    | 6  | 0 | 0           | <b>2.26</b> |
| Neu-Ulm            | 61 | 17 | 1 | <b>5.9</b>  | 0  |   |             | <b>2.90</b> |
| Regensburg         | 30 | 36 | 0 | <b>0</b>    | 22 | 0 | <b>0</b>    | <b>2.6</b>  |
| Rosenheim          | 55 | 44 | 4 | <b>9.1</b>  | 0  |   |             | <b>5.01</b> |
| Roth               | 19 | 40 | 1 | <b>2.5</b>  | 35 | 0 | <b>0</b>    | <b>0</b>    |
|                    | 20 | 38 | 1 | <b>2.6</b>  | 18 | 3 | <b>16.7</b> |             |
| Rottal-Inn         | 57 | 44 | 4 | <b>9.1</b>  | 20 | 1 | <b>5.0</b>  | <b>7.48</b> |

Table A.2. Intra-herd prevalence (IHP) of TBEV-specific antibodies in small ruminants in German non-TBEV risk areas (Schleswig-Holstein, Lower Saxony, North Rhine-Westphalia) and incidence of human TBE in 2017 within the districts.

|                     | Flock ID                  | No. of Sheep | No. of positive Sheep | IHP Sheep % | No. of Goats | No. of positive Goats | IHP Goat %  | Incidence Humans 2017 |
|---------------------|---------------------------|--------------|-----------------------|-------------|--------------|-----------------------|-------------|-----------------------|
| District            | <b>Schleswig-Holstein</b> |              |                       |             |              |                       |             |                       |
| Dithmarschen        | 17                        | 44           | 0                     | <b>0</b>    | 0            |                       |             | <b>0</b>              |
| Duchy of Lauenburg  | 4                         | 44           | 0                     | <b>0</b>    | 0            |                       |             | <b>0</b>              |
|                     | 6                         | 44           | 0                     | <b>0</b>    | 0            |                       |             |                       |
|                     | 10                        | 44           | 1                     | <b>2.3</b>  | 0            |                       |             |                       |
| North Friesland     | 15                        | 35           | 0                     | <b>0</b>    | 0            |                       |             | <b>0</b>              |
|                     | 16                        | 44           | 0                     | <b>0</b>    | 0            |                       |             |                       |
|                     | 39                        | 44           | 0                     | <b>0</b>    | 0            |                       |             |                       |
|                     | 73                        | 44           | 0                     | <b>0</b>    | 0            |                       |             |                       |
| Schleswig-Flensburg | 14                        | 40           | 0                     | <b>0</b>    | 0            |                       |             | <b>0</b>              |
|                     | 38                        | 36           | 0                     | <b>0</b>    | 0            |                       |             |                       |
|                     | 40                        | 36           | 0                     | <b>0</b>    | 0            |                       |             |                       |
|                     | 41                        | 44           | 0                     | <b>0</b>    | 20           | 0                     | <b>0</b>    |                       |
| District            | <b>Lower Saxony</b>       |              |                       |             |              |                       |             |                       |
| Celle               | 47                        | 38           | 0                     | <b>0</b>    | 19           | 0                     | <b>0</b>    | <b>0.56</b>           |
| Cuxhaven            | 45                        | 44           | 0                     | <b>0</b>    | 0            |                       |             | <b>0</b>              |
| Diepolz             | 7                         | 44           | 0                     | <b>0</b>    | 0            |                       |             | <b>0</b>              |
| Göttingen           | 25                        | 30           | 0                     | <b>0</b>    | 32           | 4                     | <b>12.5</b> | <b>0</b>              |
| Hannover            | 11                        | 41           | 0                     | <b>0</b>    | 0            |                       |             | <b>0</b>              |
|                     | 37                        | 35           | 0                     | <b>0</b>    | 0            |                       |             |                       |
| Jade-Weser          | 74                        | 44           | 0                     | <b>0</b>    | 0            |                       |             | <b>0</b>              |
| Lüchow-Danneberg    | 24                        | 21           | 0                     | <b>0</b>    | 15           | 0                     | <b>0</b>    | <b>0</b>              |
|                     | 27                        | 44           | 0                     | <b>0</b>    | 0            |                       |             |                       |
| Northeim            | 26                        | 36           | 0                     | <b>0</b>    | 0            |                       |             | <b>0</b>              |
| Wolfenbüttel        | 44                        | 35           | 0                     | <b>0</b>    | 0            |                       |             | <b>0</b>              |

| District                | North Rhine-Westphalia |    |   |            |    |   |          |             |
|-------------------------|------------------------|----|---|------------|----|---|----------|-------------|
| Bielefeld               | 8                      | 44 | 1 | <b>2.3</b> | 0  |   |          | <b>0</b>    |
| Borken                  | 12                     | 44 | 0 | <b>0</b>   | 0  |   |          | <b>0.27</b> |
|                         | 50                     | 34 | 0 | <b>0</b>   | 5  | 0 | <b>0</b> |             |
| Euskirchen              | 54                     | 44 | 0 | <b>0</b>   | 0  |   |          | <b>0</b>    |
| Gütersloh               | 51                     | 30 | 0 | <b>0</b>   | 0  |   |          | <b>0</b>    |
| Hochsauer-<br>landkreis | 52                     | 16 | 0 | <b>0</b>   | 0  |   |          | <b>0</b>    |
|                         | 53                     | 31 | 0 | <b>0</b>   | 19 | 0 | <b>0</b> |             |
| Höxter                  | 79                     | 44 | 0 | <b>0</b>   | 14 | 0 | <b>0</b> | <b>0</b>    |
| Mettmann                | 48                     | 18 | 1 | <b>5.6</b> | 0  |   |          | <b>0</b>    |
|                         | 49                     | 27 | 0 | <b>0</b>   | 0  |   |          |             |
| Minden-Lübbecke         | 60                     | 44 | 3 | <b>6.8</b> | 0  |   |          | <b>0.32</b> |
| Paderborn               | 75                     | 44 | 0 | <b>0</b>   | 0  |   |          | <b>0</b>    |
